# Supplementary material for: Liquid crystal microcapillary-based sensors for affordable analytical applications
Source: Royal Society of Chemistry journal article supplement (doi:10.1039/d2sm00131d), 2022-01-01
Supplement: d2sm00131d1.pdf [file d2sm00131d1.pdf]

## Supplementary Information

### Liquid Crystal Microcapillary-Based Sensors for Affordable Analytical Applications

Elif Kurt and Emre Bukusoglu\*

Department of Chemical Engineering, Middle East Technical University, Dumlupınar  
Bulvarı No:1, Çankaya, Ankara, 06800, Turkey.

\*email: [emrebuk@metu.edu.tr](mailto:emrebuk@metu.edu.tr)

#### Equilibrium Configuration of LC Compartment, Four-Petal Appearance

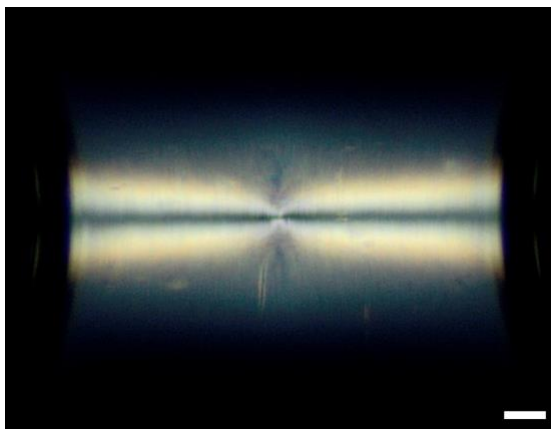

**Fig. S1.** Equilibrium configuration of LC compartment inside microcapillary with high exposure time to observe dark vertical and horizontal lines crossing through the point defect. Scale bar: 100  $\mu\text{m}$ .”

## Effect of Diffusion Path Length

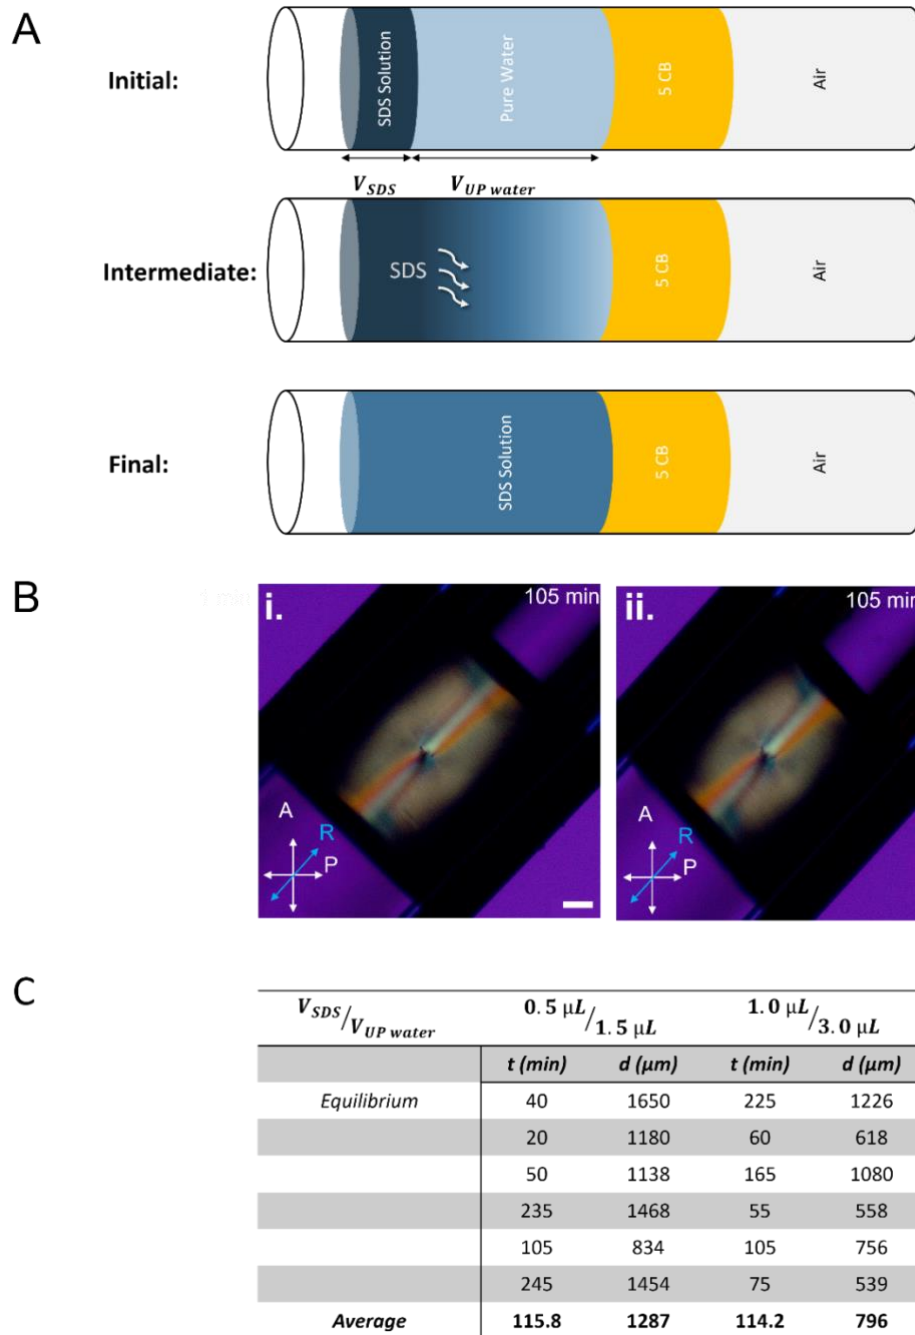

**Fig. S2.** Diffusion and equilibrium time analysis with the systems where one side of the LC phase was opened to atmosphere; (A) Schematic representation of experimental setup, (B) 45° angled POM images of LC compartments where aqueous SDS solution/UP water volumes were (i.) 0.5  $\mu$ L/1.5  $\mu$ L and (ii.) 1.0  $\mu$ L/3.0  $\mu$ L. (C) Equilibrium times for each volume ratios,  $d$  represents the LC compartment size. Scale bar: 100  $\mu$ m.

### Analysis with Cationic Surfactant Solution (CTAB)

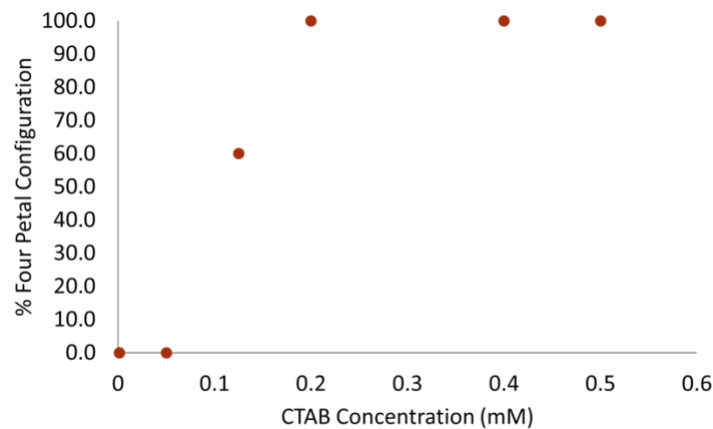

**Fig. S3.** Distribution of overall number of experiments that four petal shape is observed with various concentrations of CTAB solution.

### Control Experiments for Purification Process

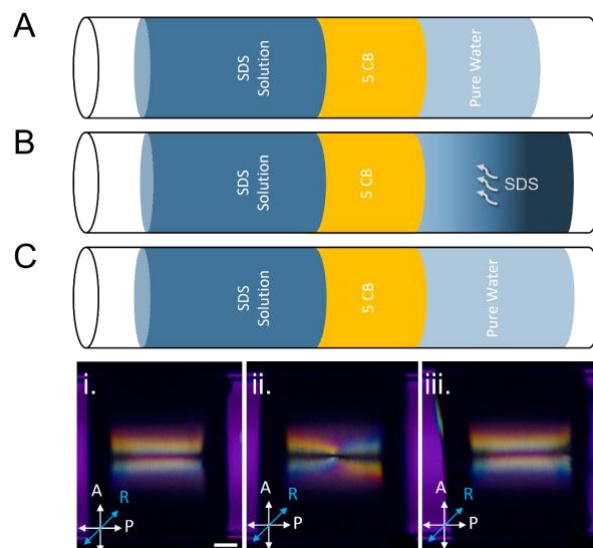

**Fig. S4.** Schematic representations (A,B,C) and polarized optical micrographs (i, ii, iii) of (A, i) the initial step of the control experiments prior to purification process, LC compartment contacting with 1.25 mM aqueous SDS solution at one side and UP water on the other side, (B, ii) the equilibrium state when the both sides of the LC compartment contacting with 1.25 mM aqueous SDS solution, (C, iii) the equilibrium state when the LC compartment contacting with UP water at one side and 1.25 mM aqueous SDS solution at the other side again, after purification process. Scale bar: 100  $\mu$ m.

## Determination of SDS Diffusion in LC Phase

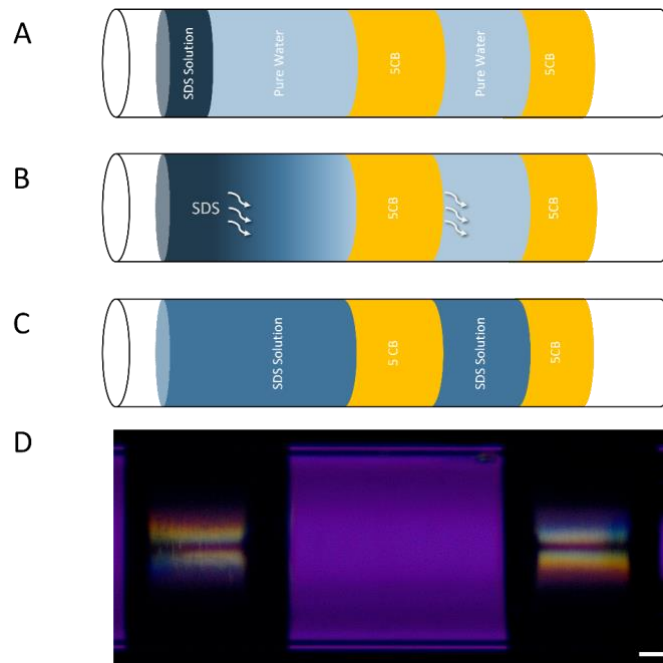

**Fig. S5.** Experimental setup for the determination of SDS diffusion in LC phase: (A) initial, (B) intermediate, (C) final, and (D) POM images of both the LC compartments in final state. Scale bar: 100  $\mu\text{m}$ .

**Video S1.** Sequential polarized optical micrographs of nematic LC compartment which shows the continuous motion of the defect until it reached equilibrium. Images were collected during transition state while LC was contacting with 2.5 mM SDS solution at both sides.
